# Supplementary material for: Comparative studies of redox behaviors of Pt–Co/SiO2 and Au–Co/SiO2 catalysts and their activities in CO oxidation
Source: Royal Society of Chemistry journal article supplement (doi:10.1039/c4cy00354c), 2014-01-01
Supplement: c4cy00354c1.pdf [file c4cy00354c1.pdf]

Support Information for  
**Comparative studies in redox behaviors of Pt-Co/SiO<sub>2</sub> and Au-Co/SiO<sub>2</sub>  
catalysts and their activities in CO oxidation**

Xuejun Xu<sup>a</sup>, Qiang Fu<sup>\*a</sup>, Mingming Wei<sup>a</sup>, Xing Wu<sup>b</sup>, and Xinhe Bao<sup>a</sup>

<sup>a</sup>State Key Laboratory of Catalysis, Dalian Institute of Chemical Physics, Chinese Academy of Sciences, Dalian 116023, China.

E-mail: [qfu@dicp.ac.cn](mailto:qfu@dicp.ac.cn) (Qiang Fu). Fax: (+86)-411-84694447.

<sup>b</sup>Department of Electrical Engineering, East China Normal University, Shanghai 200241, China

| Sample                | Nominal loading of NM (%) | Nominal loading of TM (%) | Actual loading of NM (%) | Actual loading of TM (%) | Atomic Ratio of NM/TM |
|-----------------------|---------------------------|---------------------------|--------------------------|--------------------------|-----------------------|
| Au/SiO <sub>2</sub>   | 4                         | --                        | 4.6                      | --                       | --                    |
| Pt/SiO <sub>2</sub>   | 4                         | --                        | 4.5                      | --                       | --                    |
| AuCo/SiO <sub>2</sub> | 4                         | 1.2                       | 4.6                      | 1.3                      | 1.09/1                |
| PtCo/SiO <sub>2</sub> | 4                         | 1.2                       | 4.5                      | 1.3                      | 1.07/1                |
| Co/SiO <sub>2</sub>   | --                        | 4                         | --                       | 3.7                      | --                    |

Table S1 The metal loading and atomic composition of Au-Co/SiO<sub>2</sub> and Pt-Co/SiO<sub>2</sub> catalysts

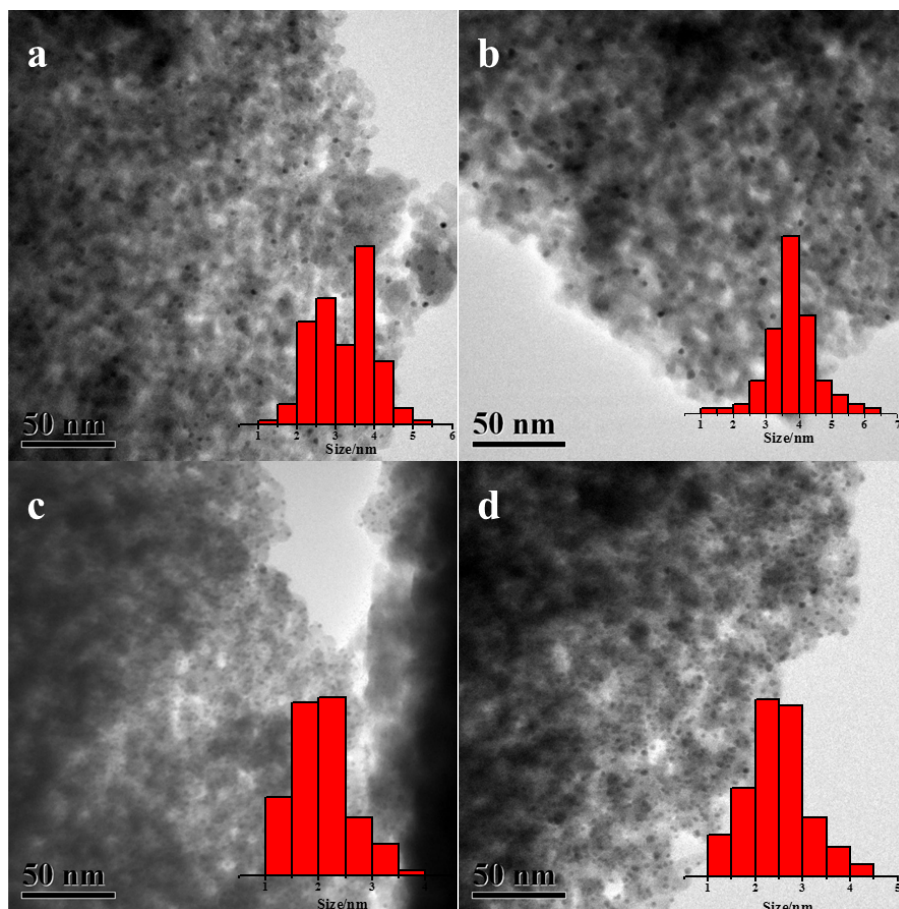

Figure S1 TEM images of a) as-prepared Pt/SiO<sub>2</sub>; b) as-prepared PtCo/SiO<sub>2</sub>; c) as-prepared Au/SiO<sub>2</sub>; d) as-prepared Au-Co/SiO<sub>2</sub>. The size distributions of the NPs are shown in the inset graphs.

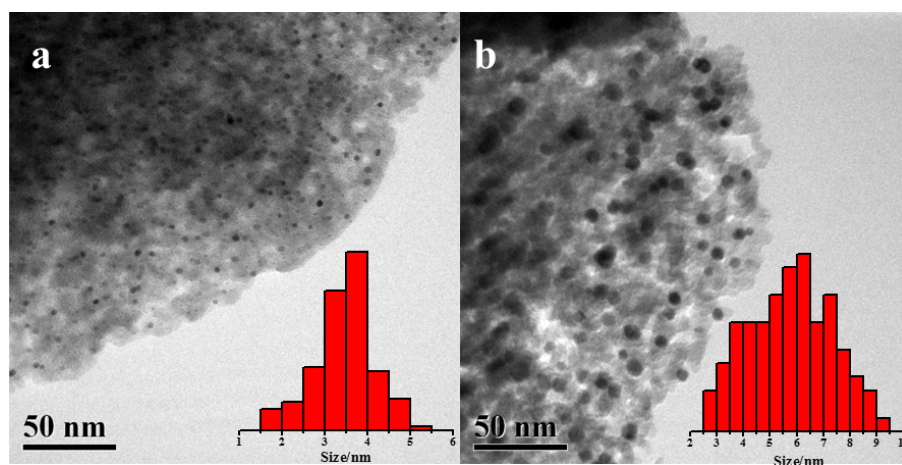

Figure S2 TEM images of a) Pt/SiO<sub>2</sub> reduced at 600 °C; b) Au/SiO<sub>2</sub> reduced at 600 °C. The size distributions of the NPs are shown in the inset graphs.

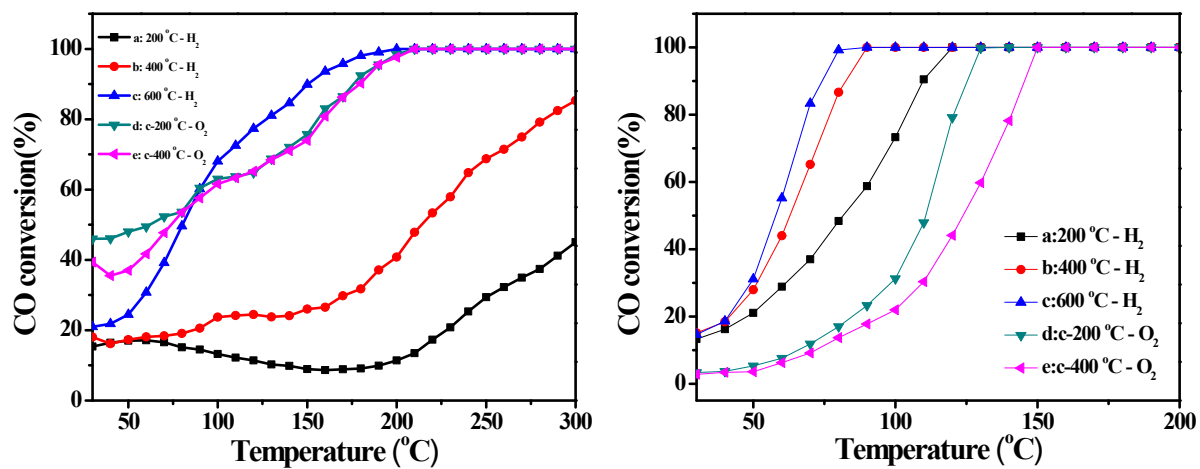

Figure S3 CO conversion light-off curve over the the as-calcined Pt-Co/SiO<sub>2</sub> (A) and Au-Co/SiO<sub>2</sub> (B) samples with different pretreatments. ( Gas composition: 1% CO, 0.5% O<sub>2</sub>, He balance; GHSV: 75000 mL.g<sup>-1</sup>.h<sup>-1</sup>.)

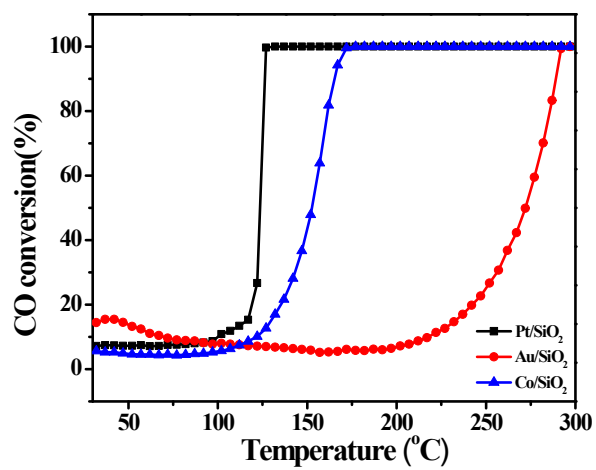

Figure S4 CO conversion light-off curve over the pure Pt/SiO<sub>2</sub>, Au/SiO<sub>2</sub> and Co/SiO<sub>2</sub> catalysts reduced at 600 °C. (Gas composition: 1% CO, 20% O<sub>2</sub>, He balance; GHSV: 75000 mL.g<sup>-1</sup>.h<sup>-1</sup>.)
